# Supplementary material
Source: PubMed Central journal article supplement (PMC4654127)
Supplement: NIHMS722469-supplement-1.pdf [file NIHMS722469-supplement-1.pdf]

## **Supplemental Table Legends:**

### **Table S1: Selected animal models of Alzheimer's disease**

Abbreviations: APP – amyloid precursor protein; CAMKII – calcium/calmodulin-dependent protein kinase II; MAPT – microtubule associated protein tau; PDGF- $\beta$  – platelet derived growth factor beta; PSEN1 – presenilin 1; TRE – tetracycline operon-responsive element; tTA – tetracycline-controlled transactivator.

## S1: Selected animal models of Alzheimer's disease

| Model Name | Genes (mutations), Promoter                                                                                                                                                        | Selected pathological and behavioral changes                                                                                                                                                                                                                                                                                          | Key References:          |
|------------|------------------------------------------------------------------------------------------------------------------------------------------------------------------------------------|---------------------------------------------------------------------------------------------------------------------------------------------------------------------------------------------------------------------------------------------------------------------------------------------------------------------------------------|--------------------------|
| Tg2576     | <ul style="list-style-type: none"> <li>• APP (KM670/671NL; Swedish mutation)</li> <li>• Promoter: hamster prion</li> </ul>                                                         | <ul style="list-style-type: none"> <li>• First amyloid plaque deposition around 6 months, numerous by 12 months</li> <li>• Absent tangles but hyper-phosphorylated tau present</li> <li>• Absent or minimal neuronal loss</li> <li>• Cognitive impairment as early as 6 months and widespread by 12 months</li> </ul>                 | (Hsiao et al., 1996)     |
| TgCRND8    | <ul style="list-style-type: none"> <li>• APP (KM670/671NL, V717F; Swedish, Indiana Mutation)</li> <li>• Promoter: hamster prion</li> </ul>                                         | <ul style="list-style-type: none"> <li>• Amyloid deposition first at 3 months and progresses with age</li> <li>• Absent tangles but hyper-phosphorylated tau present</li> <li>• Variable cell loss by region with fewer hippocampal neurons at 6 months</li> <li>• Cognitive impairment as early as 3 months</li> </ul>               | (Chishti et al., 2001)   |
| J20        | <ul style="list-style-type: none"> <li>• APP (KM670/671NL, V717F; Swedish, Indiana Mutation)</li> <li>• Promoter: PDGF-<math>\beta</math></li> </ul>                               | <ul style="list-style-type: none"> <li>• Amyloid deposition progresses with age, first at 5-7 months and widespread by 8-10 months</li> <li>• Absent tangles</li> <li>• Variable cell loss by region with fewer hippocampal CA1 neurons from 3 months</li> <li>• Cognitive impairment as early as 4 months</li> </ul>                 | (Mucke et al., 2000)     |
| APP/PS1    | <ul style="list-style-type: none"> <li>• APP (KM670/671NL; Swedish mutation)</li> <li>• PSEN1 (L166P)</li> <li>• Promoter: Thy1</li> </ul>                                         | <ul style="list-style-type: none"> <li>• Amyloid deposition first at 1.5 months and progresses with age</li> <li>• Phosphorylated tau-positive neuritic process around plaques</li> <li>• Modest neuronal loss in dentate gyrus at 17 months</li> <li>• Cognitive impairments at 7-8 months</li> </ul>                                | (Radde et al., 2006)     |
| 3xTg       | <ul style="list-style-type: none"> <li>• APP (KM670/671NL; Swedish mutation)</li> <li>• PSEN1 (M146V)</li> <li>• MAPT (P301L)</li> <li>• Promoter: Thy1.2</li> </ul>               | <ul style="list-style-type: none"> <li>• Amyloid deposition first at 6 months and progresses with age</li> <li>• No tau pathology at 6 months, and tau immunoreactivity extensive by 12 months</li> <li>• Unknown cell loss</li> <li>• Cognitive impairment as early as 4 months prior to formation of plaques and tangles</li> </ul> | (Oddo et al., 2003)      |
| Tg4510     | <ul style="list-style-type: none"> <li>• MAPT (P301L)</li> <li>• Transgene downstream of TRE and driven by tTA under the control of CaMKII-<math>\alpha</math> promoter</li> </ul> | <ul style="list-style-type: none"> <li>• No amyloid plaques</li> <li>• Tangles present at 4 months</li> <li>• Significant neuronal and brain volume loss</li> <li>• Cognitive impairment starting as early as 2.5 months</li> </ul>                                                                                                   | (Santacruz et al., 2005) |

## Supplemental References:

Chishti, M.A., Yang, D.S., Janus, C., Phinney, A.L., Horne, P., Pearson, J., Strome, R., Zuker, N., Loukides, J., French, J., et al. (2001). Early-onset amyloid deposition and cognitive deficits in transgenic mice expressing a double mutant form of amyloid precursor protein 695. *J. Biol. Chem.* 276, 21562–21570.

Hsiao, K., Chapman, P., Nilsen, S., Eckman, C., Harigaya, Y., Younkin, S., Yang, F., and Cole, G. (1996). Correlative memory deficits, Abeta elevation, and amyloid plaques in transgenic mice. *Science* 274, 99–102.

Mucke, L., Masliah, E., Yu, G.Q., Mallory, M., Rockenstein, E.M., Tatsuno, G., Hu, K., Kholodenko, D., Johnson-Wood, K., and McConlogue, L. (2000). High-level neuronal expression of abeta 1-42 in wild-type human amyloid protein precursor transgenic mice: synaptotoxicity without plaque formation. *Journal of Neuroscience* 20, 4050–4058.

Oddo, S., Caccamo, A., Shepherd, J.D., Murphy, M.P., Golde, T.E., Kaye, R., Metherate, R., Mattson, M.P., Akbari, Y., and LaFerla, F.M. (2003). Triple-transgenic model of Alzheimer's disease with plaques and tangles: intracellular Abeta and synaptic dysfunction. *Neuron* 39, 409–421.

Radde, R., Bolmont, T., Kaeser, S.A., Coomaraswamy, J., Lindau, D., Stoltze, L., Calhoun, M.E., Jäggi, F., Wolburg, H., Gengler, S., et al. (2006). Abeta42-driven cerebral amyloidosis in transgenic mice reveals early and robust pathology. *EMBO Rep.* 7, 940–946.

Santacruz, K., Lewis, J., Spires, T., Paulson, J., Kotilinek, L., Ingelsson, M., Guimaraes, A., DeTure, M., Ramsden, M., McGowan, E., et al. (2005). Tau suppression in a neurodegenerative mouse model improves memory function. *Science* 309, 476–481.
